# Supplementary material for: Developmental changes in ciliary composition during gametogenesis in Chlamydomonas
Source: PubMed Central journal article supplement — Mol Biol Cell. 2022 May 25;33(7):br10. doi: 10.1091/mbc.E22-02-0033 (PMC9561859; doi:10.1091/mbc.e22-02-0033), 2022-05-25
Supplement: mbc-33-br10-s001.pdf [file mbc-33-br10-s001.pdf]

# Supplementary Materials

*Molecular Biology of the Cell*

Sakato-Antoku and King

# Supplemental Material for

## Developmental Changes in Ciliary Composition during Gametogenesis in *Chlamydomonas*

**Miho Sakato-Antoku and Stephen M. King**

Department of Molecular Biology and Biophysics, University of Connecticut Health Center, 263 Farmington Avenue, Farmington, Connecticut 06030-3305, USA.

### Supplemental Table S1

#### Global Analysis of Mass Spectrometry Data for Vegetative and Gametic Cilia

| Sample                      | Proteins Present in all 3 Replicates | Proteins Unique to Sample* A Samples | Proteins Unique to Sample B Samples | Proteins Unique to Sample C Samples |
|-----------------------------|--------------------------------------|--------------------------------------|-------------------------------------|-------------------------------------|
| 1. CC124 V M&M <sup>†</sup> | 978                                  | 574                                  | 565                                 | 571                                 |
| 2. CC124 V Axo              | 750                                  | 310                                  | 327                                 | 318                                 |
| 3. CC124 G M&M              | 1355                                 | 821                                  | 868                                 | 850                                 |
| 4. CC124 G Axo              | 840                                  | 290                                  | 281                                 | 285                                 |
| 5. CC125 V M&M              | 947                                  | 576                                  | 586                                 | 564                                 |
| 6. CC125 V Axo              | 744                                  | 309                                  | 309                                 | 306                                 |
| 7. CC125 G M&M              | 1004                                 | 592                                  | 580                                 | 606                                 |
| 8. CC125 G Axo              | 757                                  | 297                                  | 287                                 | 298                                 |

<sup>†</sup> V, vegetative; G, gametic; M&M, membrane plus matrix; Axo, axoneme.

\* For example, for Sample A of CC124 vegetative cilia, 574 proteins out of the 978 identified in the membrane plus matrix fraction were exclusively present in that fraction, while 310 proteins out of the 750 identified were only found in the axonemal fraction.

### Supplemental Table S2 Legend

#### Abundance Data for Vegetative and Gametic Cilia Samples

This table provides the mass spectrometric abundance data (normalized total spectral counts) for all replicates (labeled A-C) of each fractionated cilia sample (labeled 1-8). Samples 1A-C = membrane/matrix vegetative CC124 mating type *minus*, 2A-C = axoneme vegetative CC124 mating type *minus*; 3A-C = membrane/matrix gametic CC124 mating type *minus*, 4A-C axoneme gametic CC124 mating type *minus*; 5A-C = membrane/matrix vegetative CC125 mating type *plus*, 6A-C = axoneme vegetative CC125 mating type *plus*; 7A-C = membrane/matrix gametic CC125 mating type *plus*, 8A-C axoneme gametic CC125 mating type *plus*. Additional tabs provide lists of proteins (Cre#s) present only in axoneme and membrane plus matrix fractions (\*.xlsx format).

### Supplemental Table S3

#### Proteins that Exhibit a $\geq 5$ -fold Change in Abundance between CC124 (mating type *minus*) Vegetative and Gametic Cilia Samples

| Vegetative Cilia > Gametic Cilia |                                                    |
|----------------------------------|----------------------------------------------------|
| Cre#                             | Description                                        |
| Cre01.g003950                    | PAS domain                                         |
| Cre01.g004124                    | PAS domain                                         |
| Cre01.g014050                    | Zinc finger protein P48ZNF                         |
| Cre01.g033000                    | FAP334                                             |
| Cre01.g044900                    | PhoD-like phosphatase                              |
| Cre01.g050050                    | Guanidino-acetate N-methyl transferase             |
| Cre01.g052000                    | NTPase with CobW (metal chaperone) domain          |
| Cre01.g054550                    | Toll receptor homology domain                      |
| Cre02.g090050                    | FAP170                                             |
| Cre02.g092900                    | GMP synthetase                                     |
| Cre02.g105400                    | Cell division cycle protein 14                     |
| Cre02.g110950                    | IFT dynein intermediate chain DIC5 (FAP133, WDR34) |
| Cre02.g143400                    | 3',5'-cNMP phosphodiesterase                       |
| Cre03.g143887                    | Arginyl tRNA synthetase                            |
| Cre03.g152550                    | WD repeat protein                                  |
| Cre03.g187450                    | Ribose-5-phosphate isomerase                       |
| Cre03.g196550                    | Antibiotic biosynthesis monooxygenase              |
| Cre03.g204601                    | Adenosine kinase                                   |
| Cre05.g233050                    | FAP162                                             |
| Cre05.g233800                    | Glycyl tRNA synthetase                             |
| Cre05.g241637                    | IFT46                                              |
| Cre06.g251200                    | IFT43                                              |
| Cre06.g275250                    | No obvious domains                                 |
| Cre06.g278167                    | DUF5522 superfamily                                |
| Cre06.g278169                    | GHMP (sugar) kinase family C-terminal domain       |
| Cre06.g286600                    | DUF4205 domain                                     |
| Cre06.g298950                    | Queuosine salvage protein family                   |
| Cre07.g326900                    | No obvious domains                                 |
| Cre07.g328850                    | NimA-related kinase                                |
| Cre07.g329700                    | Proteasome subunit P45                             |
| Cre07.g344150                    | Queuosine salvage protein family                   |
| Cre08.g361200                    | Outer dynein arm assembly factor ODA10             |
| Cre08.g361950                    | FAP153 (PAS domain)                                |

| Gametic Cilia > Vegetative Cilia |                                                                       |
|----------------------------------|-----------------------------------------------------------------------|
| Cre#                             | Description                                                           |
| Cre01.g001678                    | S/T kinase                                                            |
| Cre01.g002500                    | Chlamyopsin 1                                                         |
| Cre01.g040750                    | No obvious domains                                                    |
| Cre01.g055420                    | Protein phosphatase 2A regulatory subunit                             |
| Cre02.g076350                    | Vacuolar ATP synthase subunit B                                       |
| Cre02.g087950                    | Methionyl tRNA synthetase                                             |
| Cre02.g097650                    | Proteasome regulatory complex subunit RPN6                            |
| Cre02.g098450                    | eIF2 $\gamma$ subunit                                                 |
| Cre02.g113200                    | Glutamine synthetase                                                  |
| Cre03.g152150                    | Zinc finger protein                                                   |
| Cre03.g189950                    | HOP1 heat shock protein chaperone                                     |
| Cre03.g206750                    | Tubby C-terminal domain-like                                          |
| Cre05.g245950                    | Dynamin-related GTPase                                                |
| Cre06.g263250                    | Alanine-rich low complexity                                           |
| Cre06.g298350                    | FAP224                                                                |
| Cre07.g317150                    | Dual specificity protein phosphatase                                  |
| Cre07.g339050                    | Cofilin                                                               |
| Cre07.g353700                    | Armadillo repeats                                                     |
| Cre09.g387171                    | Nucleotide rhamnose synthase/epimerase-reductase                      |
| Cre09.g393506                    | Hydroxylamine reductase                                               |
| Cre09.g393650                    | N-terminal GAF domain and C-terminal kinase domain                    |
| Cre09.g394200                    | FAP102                                                                |
| Cre09.g400850                    | Carbohydrate binding and C-terminal polycystin cation channel domains |
| Cre10.g434750                    | Acetohydroxy acid isomero-reductase                                   |
| Cre10.g459200                    | P-type ATPase/cation transporter                                      |
| Cre10.g461250                    | Vesicle fusing ATPase (NSF)                                           |
| Cre11.g469800                    | Contains DUF1399 domain                                               |
| Cre11.g478156                    | AP-1 complex $\beta$ -1 subunit                                       |
| Cre12.g484150                    | S/T protein phosphatase 6 regulatory subunit 3                        |
| Cre12.g497300                    | Rhodanase-like Ca <sup>2+</sup> -sensing receptor                     |
| Cre12.g503600                    | Leucine-rich repeat protein                                           |
| Cre12.g507750                    | Protein kinase with N-terminal ankyrin repeats                        |
| Cre12.g530650                    | Glutamine synthetase                                                  |

|               |                                                             |
|---------------|-------------------------------------------------------------|
| Cre08.g362050 | FAP49 (PAS domain)                                          |
| Cre08.g382100 | S/T kinase                                                  |
| Cre09.g387912 | FAP139                                                      |
| Cre09.g401700 | TPR repeats                                                 |
| Cre10.g423300 | Bleomycin hydrolase                                         |
| Cre10.g428664 | IFT dynein intermediate chain DIC6 (FAP163, WDR60)          |
| Cre10.g432450 | Ankyrin repeats                                             |
| Cre10.g433600 | Methylene tetrahydrofolate reductase                        |
| Cre10.g437100 | DUF383 domain                                               |
| Cre11.g467611 | Bestrophin chloride channel                                 |
| Cre12.g484500 | Ankyrin repeats                                             |
| Cre12.g489250 | Formin-related                                              |
| Cre12.g514650 | S/T kinase (NimA-related) with IFT57-like C-terminal domain |
| Cre12.g541550 | SYLF domain – lipid binding module                          |
| Cre12.g559300 | Armadillo repeats                                           |
| Cre13.g567500 | Alanine/glycine/proline-rich                                |
| Cre14.g609202 | Zinc metallopeptidase                                       |
| Cre15.g641451 | Transmembrane protein                                       |
| Cre16.g654800 | Ankyrin repeats                                             |
| Cre16.g680250 | No obvious domains, signal peptide                          |
| Cre16.g680300 | Phosphatidylcholine-sterol O-acyltransferase                |
| Cre17.g708100 | Hypoxanthine phosphoribosyl transferase                     |
| Cre17.g718900 | FAP88                                                       |
| Cre17.g738050 | Aggregation protein AGG4                                    |
| Cre17.g742300 | FAP179                                                      |
| Cre17.g746697 | FAP249                                                      |

|               |                                                     |
|---------------|-----------------------------------------------------|
| Cre13.g604650 | Methionyl aminopeptidase                            |
| Cre14.g612000 | S/T kinase ULK4                                     |
| Cre14.g617050 | Armadillo repeats                                   |
| Cre16.g651750 | Isoleucyl tRNA synthetase                           |
| Cre16.g652100 | Methionine aminopeptidase                           |
| Cre16.g662951 | Heterokaryon incompatibility/ankyrin repeat protein |
| Cre16.g676200 | Guanylate-binding protein                           |
| Cre16.g689647 | Argonaute-like protein                              |
| Cre17.g696250 | eIF4G                                               |
|               |                                                     |
| Cre17.g708300 | Proteasome regulatory subunit RPN12                 |
| Cre17.g725200 | ABC transporter                                     |

## Supplemental Table S4

### Proteins that Exhibit a $\geq 5$ -fold Change in Abundance between CC125 (mating type *plus*) Vegetative and Gametic Cilia Samples

| Vegetative Cilia > Gametic Cilia |                                                     |
|----------------------------------|-----------------------------------------------------|
| Cre#                             | Description                                         |
| Cre02.g094350                    | Importin $\alpha$ 1b                                |
| Cre02.g108450                    | FAP280                                              |
| Cre03.g156850                    | Sphingomyelin phosphodiesterase-related             |
| Cre03.g177200                    | CELF family RNA binding                             |
| Cre03.g198000                    | Protein phosphatase 2C                              |
| Cre03.g199759                    | Oxysterol binding protein                           |
| Cre06.g293900                    | UBX domain protein 11                               |
| Cre06.g302800                    | S/T kinase                                          |
| Cre06.g304150                    | Heterokaryon incompatibility/ankyrin repeat protein |
| Cre08.g362050                    | FAP49                                               |
| Cre08.g362100                    | FAP154                                              |
| Cre09.g399030                    | 4-hydroxyphenyl pyruvate dioxygenase                |
| Cre11.g467611                    | Bestrophin chloride channel                         |
| Cre11.g467770                    | Phosphoglycerate kinase                             |
| Cre12.g489250                    | Formin-related                                      |
| Cre12.g495250                    | FAP31                                               |
| Cre12.g553900                    | cNMP-gated K <sup>+</sup> channel                   |
| Cre12.g554800                    | Phosphoribulokinase                                 |
| Cre16.g674700                    | ADP-ribosyl dinitrogen reductase                    |
| Cre16.g693601                    | Hydroxyproline-rich pherophorin                     |
| Cre17.g706250                    | Kinesin light chain 2                               |
| Cre17.g725200                    | ABC transporter-like                                |
| Cre17.g728700                    | MAP kinase kinase kinase STE11                      |

| Gametic Cilia > Vegetative Cilia |                                                                                   |
|----------------------------------|-----------------------------------------------------------------------------------|
| Cre#                             | Description                                                                       |
| Cre01.g003376                    | DnaJ homolog                                                                      |
| Cre02.g110350                    | Synaptogamin-related                                                              |
| Cre02.g113200                    | Glutamine synthetase                                                              |
| Cre03.g156750                    | T complex protein 1 $\epsilon$ subunit                                            |
| Cre03.g161550                    | FAP55 (prefoldin domain)                                                          |
| Cre03.g166450                    | No obvious domains                                                                |
| Cre05.g239450                    | Atypical dual specificity phosphatase                                             |
| Cre06.g250200                    | S-adenosylmethionine synthetase                                                   |
| Cre06.g278125                    | MyTH4 and ERM plasma membrane binding domain plus C-terminal kinesin motor domain |
| Cre07.g322550                    | FAP240                                                                            |
| Cre07.g336200                    | Ubiquitin carboxyl terminal hydrolase USP7                                        |
| Cre07.g339050                    | Cofilin                                                                           |
| Cre09.g389282                    | FAP114                                                                            |
| Cre09.g397200                    | T complex protein 1 $\zeta$ subunit                                               |
| Cre10.g439100                    | T complex protein 1 $\alpha$ subunit                                              |
| Cre10.g443250                    | T complex protein 1 $\gamma$ subunit                                              |
| Cre11.g467547                    | tRNA synthetase-related                                                           |
| Cre11.g469800                    | Contains DUF1399 domain                                                           |
| Cre11.g479250                    | RAN GTPase-activating (RANGAP1)                                                   |
| Cre12.g484150                    | S/T protein phosphatase 6 regulatory subunit 3                                    |
| Cre12.g497450                    | Toll-like receptor                                                                |
| Cre12.g502700                    | Coiled coil protein                                                               |
| Cre12.g506400                    | No obvious domains                                                                |
| Cre12.g515350                    | Polycystin cation channel with RCC1 domain                                        |
| Cre12.g528850                    | Outer arm dynein LC3                                                              |
| Cre12.g532950                    | Ionotropic glutamate receptor                                                     |
| Cre12.g560350                    | NIMA-related kinase 2                                                             |
| Cre13.g602400                    | Kinesin (Kin8 family)                                                             |
| Cre13.g604050                    | Superficially similar to GPCRs with pectate lyase repeats                         |
| Cre14.g618776                    | No obvious domains                                                                |
| Cre15.g635600                    | FAP357                                                                            |
| Cre16.g652100                    | Methionine aminopeptidase                                                         |
| Cre16.g655750                    | Tektin                                                                            |
